# Supplementary material
Source: PubMed Central journal article supplement (PMC2939140)

1  
2  
3  
4 **Fig. S1.** HC and CFS networks have significantly different topology. Three frequency  
5  
6 distributions are shown to compare the similar graph edit distances between consensus  
7  
8 networks within each diagnostic category (green HC and red CFS), and contrast these  
9  
10 with the graph edit distances between consensus networks drawn from different  
11  
12 diagnostic categories (blue). The two distributions for HC and CFS diagnoses overlap,  
13  
14 and so are stacked. Each indicates the distribution of graph edit distances between  
15  
16 consensus networks of the same diagnostic category, and contains  $n(n-1)/2 = 45$   
17  
18 distances, where  $n = 10$  is the number of consensus networks calculated for both HC  
19  
20 and CFS. The average graph edit distance between consensus networks is slightly  
21  
22 lower in CFS (red) than HC (green), but similar ( $\approx 0.35$ ). The average graph edit  
23  
24 distance between two networks (blue), one HC and one CFS, is significantly larger ( $\approx$   
25  
26 2.0); this distribution contains  $n \times n = 100$  distances.  
27  
28  
29  
30  
31  
32  
33  
34  
35  
36  
37  
38  
39  
40  
41  
42  
43  
44  
45  
46  
47  
48  
49  
50  
51  
52  
53  
54  
55  
56  
57  
58  
59  
60  
61  
62  
63  
64  
65

**Table S1. A majority of the cytokines is differentially expressed in CFS.** Mean and median expression (pg/ml) of 16 cytokines in healthy controls and CFS patients including the dispersion of these values in terms of the standard error and median absolute deviation from the median (MAD). Significance of the difference in median (delta median) is estimated using a p-value calculated via the Wilcoxon rank-sum test for two independent samples. Values below the lower detection limit were set to zero.

| Marker | Healthy(HC)                  |                            | CFS              |               | Delta Median |
|--------|------------------------------|----------------------------|------------------|---------------|--------------|
|        | Mean (std err <sup>a</sup> ) | Median (MAD <sup>b</sup> ) | Mean (std err)   | Median (MAD)  | p-value      |
| IL1a   | 3.16 (0.48)                  | 2.33 (1.45)                | 5.07 (8.13)      | 3.18 (1.32)   | 0.04         |
| IL1b   | 17.53 (5.43)                 | 6.25 (2.47)                | 47.39 (90.57)    | 13.44 (10.54) | 0.04         |
| IL2    | 4.20 (1.15)                  | 2.50 (0.46)                | 11.12 (30.95)    | 2.28 (1.23)   | 0.42         |
| IL4    | 1.69 (0.54)                  | 0.51 (0.22)                | 12.09 (37.47)    | 1.65 (0.94)   | 0.00         |
| IL5    | 6.43 (1.11)                  | 3.84 (0.83)                | 13.39 (24.92)    | 7.37 (1.08)   | 0.00         |
| IL6    | 6.79 (1.82)                  | 3.24 (1.59)                | 17.06 (40.95)    | 6.45 (3.28)   | 0.00         |
| IL8    | 19.86 (1.96)                 | 15.40 (5.25)               | 22.26 (34.27)    | 8.96 (4.56)   | 0.00         |
| IL10   | 7.17 (1.63)                  | 3.58 (1.48)                | 5.87 (8.66)      | 3.31 (1.34)   | 0.75         |
| IL12   | 3.18 (0.46)                  | 2.03 (0.37)                | 9.38 (18.44)     | 4.42 (2.09)   | 0.00         |
| IL13   | 0.46 (0.01)                  | 0.44 (0.02)                | 0.42 (0.26)      | 0.36 (0.10)   | 0.00         |
| IL15   | 43.43 (5.31)                 | 27.38 (12.18)              | 29.14 (40.96)    | 13.54 (7.07)  | 0.00         |
| IL17   | 7.38 (3.00)                  | 2.86 (1.54)                | 5.75 (7.01)      | 3.75 (2.92)   | 0.78         |
| IL23   | 641.60 (204.91)              | 97.84 (73.16)              | 344.07 (1094.72) | 81.97 (12.43) | 0.81         |
| IFNg   | 13.31 (4.19)                 | 2.59 (1.91)                | 17.02 (38.27)    | 3.11 (3.11)   | 0.47         |
| LTa    | 9.69 (3.92)                  | 2.12 (1.17)                | 19.36 (35.83)    | 7.48 (3.13)   | 0.00         |
| TNFa   | 18.48 (5.75)                 | 6.37 (1.72)                | 27.75 (50.15)    | 7.26 (5.09)   | 0.95         |

<sup>a</sup> std err is the standard error of the mean

<sup>b</sup> MAD is the median absolute deviation from the median, a robust dispersion

statistic such that  $MAD = \overline{|x - \bar{X}^*|}$  and  $\bar{X}^*$  indicates a median value.

**Table S2. A large majority of the cytokines was differentially related in CFS.** The role each node plays among the others within a network is highly influenced by its degree centrality and eigenvector centrality. Consequently, changes in centrality scores are important for understanding the cytokine network in CFS patients. Significance was estimated using a p-value calculated via Welsh's (Student's) t-test for samples with unequal variances.

| Marker | Mean Degree |             |         | Eigenvector Centrality |             |         |
|--------|-------------|-------------|---------|------------------------|-------------|---------|
|        | HC          | CFS         | p-value | HC                     | CFS         | p-value |
| IL1a   | 0.16 (0.01) | 0.14 (0.01) | 0.216   | 0.23 (0.02)            | 0.14 (0.01) | 0.000   |
| IL1b   | 0.32 (0.01) | 0.46 (0.01) | 0.000   | 0.44 (0.01)            | 0.59 (0.00) | 0.000   |
| IL2    | 0.19 (0.01) | 0.31 (0.00) | 0.000   | 0.24 (0.01)            | 0.45 (0.01) | 0.000   |
| IL4    | 0.19 (0.01) | 0.37 (0.01) | 0.000   | 0.30 (0.01)            | 0.49 (0.01) | 0.000   |
| IL5    | 0.23 (0.01) | 0.04 (0.01) | 0.000   | 0.30 (0.01)            | 0.01 (0.00) | 0.000   |
| IL6    | 0.31 (0.02) | 0.18 (0.01) | 0.000   | 0.41 (0.01)            | 0.10 (0.01) | 0.000   |
| IL8    | 0.01 (0.01) | 0.03 (0.00) | 0.019   | 0.02 (0.01)            | 0.04 (0.01) | 0.171   |
| IL10   | 0.02 (0.00) | 0.16 (0.01) | 0.000   | 0.03 (0.00)            | 0.03 (0.01) | 0.588   |
| IL12   | 0.41 (0.01) | 0.29 (0.01) | 0.000   | 0.49 (0.01)            | 0.29 (0.02) | 0.000   |
| IL13   | 0.32 (0.01) | 0.07 (0.00) | 0.000   | 0.41 (0.01)            | 0.03 (0.00) | 0.000   |
| IL15   | 0.43 (0.01) | 0.41 (0.01) | 0.174   | 0.53 (0.01)            | 0.52 (0.01) | 0.138   |
| IL17   | 0.23 (0.01) | 0.04 (0.01) | 0.000   | 0.28 (0.01)            | 0.02 (0.01) | 0.000   |
| IL23   | 0.02 (0.00) | 0.05 (0.01) | 0.000   | 0.02 (0.00)            | 0.01 (0.00) | 0.276   |
| IFNg   | 0.27 (0.01) | 0.44 (0.01) | 0.000   | 0.35 (0.01)            | 0.56 (0.00) | 0.000   |
| LTa    | 0.35 (0.01) | 0.35 (0.01) | 0.955   | 0.47 (0.01)            | 0.38 (0.01) | 0.000   |
| TNFa   | 0.32 (0.01) | 0.48 (0.00) | 0.000   | 0.44 (0.01)            | 0.59 (0.00) | 0.000   |

**Table S3.** Coefficients of inter and intra-assay variation (CV) along with detection limits for each cytokine assay with the number of observations in the HC (n=59) and the CFS (n=40) groups below the lower limit of detection (LLD\*), and the lowest non-zero concentration used for the standard curve (LSC). The LLD for the standard Quansys protocol is also shown for comparison.

| Cytokine           | Modified Protocol * |          | LLD* (pg/ml) | #CFS < LLD* | #HC < LLD* | LSC (pg/ml) | #CFS < LSC | #HC < LSC | Standard Quansys Protocol |            |           |
|--------------------|---------------------|----------|--------------|-------------|------------|-------------|------------|-----------|---------------------------|------------|-----------|
|                    | CV Inter            | CV Intra |              |             |            |             |            |           | LLD (pg/ml)               | #CFS < LLD | #HC < LLD |
| IL-1a              | 0.12                | 0.05     | (-0.72)      | 0           | 0          | 4.70        | 33         | 49        | 2.11                      | 15         | 28        |
| IL-1b              | 0.10                | 0.05     | (-2.79)      | 0           | 0          | 5.50        | 12         | 25        | 2.43                      | 6          | 2         |
| IL-2               | 0.19                | 0.07     | 0.97         | 4           | 0          | 3.90        | 26         | 50        | 2.07                      | 17         | 12        |
| IL-4               | 0.19                | 0.07     | (-0.99)      | 0           | 0          | 2.30        | 26         | 52        | 0.95                      | 13         | 42        |
| IL-5               | 0.15                | 0.05     | (-0.11)      | 0           | 0          | 5.50        | 3          | 44        | 3.56                      | 0          | 27        |
| IL-6               | 0.30                | 0.08     | 0.20         | 0           | 1          | 4.30        | 13         | 39        | 3.5                       | 8          | 32        |
| IL-8               | 0.19                | 0.09     | (-5.15)      | 0           | 0          | 5.50        | 11         | 1         | 0.22                      | 0          | 0         |
| IL-10              | 0.11                | 0.04     | 0.16         | 0           | 0          | 3.90        | 25         | 33        | 0.39                      | 0          | 0         |
| IL-12              | 0.62                | 0.36     | (-0.45)      | 0           | 0          | 2.00        | 5          | 27        | 1.28                      | 2          | 0         |
| IL-13              | 0.23                | 0.08     | (-0.06)      | 0           | 0          | 2.50        | 40         | 59        | 0.53                      | 33         | 36        |
| IL-15              | 0.21                | 0.07     | (-4.09)      | 0           | 0          | 3.90        | 2          | 2         | 2.42                      | 0          | 0         |
| IL-17              | 0.15                | 0.10     | 1.00         | 11          | 7          | 2.70        | 15         | 27        | 1.12                      | 12         | 7         |
| IL-23              | 0.15                | 0.07     | (-9.27)      | 0           | 0          | 23.40       | 2          | 8         | 28.55                     | 2          | 11        |
| IFNg               | 0.23                | 0.06     | (-2.83)      | 0           | 0          | 2.70        | 20         | 32        | 0.16                      | 11         | 6         |
| TNFa               | 0.16                | 0.05     | (-2.77)      | 0           | 0          | 4.70        | 13         | 9         | 1.66                      | 2          | 0         |
| Lta                | 0.16                | 0.07     | (-0.31)      | 0           | 0          | 2.30        | 4          | 32        | 1.93                      | 4          | 28        |
| Avg CV inter-assay | 0.20                |          |              |             |            |             |            |           |                           |            |           |
| Avg CV intra-assay | 0.09                |          |              |             |            |             |            |           |                           |            |           |

**Table S4.** Spearman cross-correlation coefficients for the expression of 16 cytokines in the Healthy Control group (HC).

|              | IL-1a | IL-1b | IL-2 | IL-4 | IL-5 | IL-6 | IL-8  | IL-10 | IL-12 | IL-13 | IL-15 | IL-17 | IL-23 | IFN $\gamma$ | TNF $\alpha$ | Lta  |
|--------------|-------|-------|------|------|------|------|-------|-------|-------|-------|-------|-------|-------|--------------|--------------|------|
| IL-1a        | 1.00  | 0.43  | 0.46 | 0.44 | 0.64 | 0.51 | 0.28  | 0.22  | 0.70  | 0.46  | 0.74  | 0.52  | 0.31  | 0.50         | 0.51         | 0.52 |
| IL-1b        | 0.43  | 1.00  | 0.47 | 0.56 | 0.41 | 0.71 | 0.40  | 0.20  | 0.55  | 0.62  | 0.60  | 0.41  | 0.32  | 0.69         | 0.83         | 0.77 |
| IL-2         | 0.46  | 0.47  | 1.00 | 0.40 | 0.49 | 0.55 | 0.16  | 0.13  | 0.59  | 0.59  | 0.45  | 0.83  | 0.38  | 0.53         | 0.37         | 0.53 |
| IL-4         | 0.44  | 0.56  | 0.40 | 1.00 | 0.33 | 0.38 | 0.25  | 0.27  | 0.62  | 0.38  | 0.60  | 0.39  | 0.26  | 0.52         | 0.68         | 0.66 |
| IL-5         | 0.64  | 0.41  | 0.49 | 0.33 | 1.00 | 0.61 | 0.34  | 0.38  | 0.67  | 0.70  | 0.65  | 0.57  | 0.37  | 0.44         | 0.40         | 0.45 |
| IL-6         | 0.51  | 0.71  | 0.55 | 0.38 | 0.61 | 1.00 | 0.38  | 0.37  | 0.57  | 0.78  | 0.59  | 0.56  | 0.29  | 0.58         | 0.59         | 0.58 |
| IL-8         | 0.28  | 0.40  | 0.16 | 0.25 | 0.34 | 0.38 | 1.00  | 0.13  | 0.40  | 0.34  | 0.37  | 0.11  | -0.03 | 0.30         | 0.39         | 0.39 |
| IL-10        | 0.22  | 0.20  | 0.13 | 0.27 | 0.38 | 0.37 | 0.13  | 1.00  | 0.31  | 0.27  | 0.22  | 0.15  | 0.32  | 0.48         | 0.38         | 0.22 |
| IL-12        | 0.70  | 0.55  | 0.59 | 0.62 | 0.67 | 0.57 | 0.40  | 0.31  | 1.00  | 0.61  | 0.74  | 0.57  | 0.40  | 0.60         | 0.58         | 0.65 |
| IL-13        | 0.46  | 0.62  | 0.59 | 0.38 | 0.70 | 0.78 | 0.34  | 0.27  | 0.61  | 1.00  | 0.68  | 0.65  | 0.36  | 0.51         | 0.49         | 0.57 |
| IL-15        | 0.74  | 0.60  | 0.45 | 0.60 | 0.65 | 0.59 | 0.37  | 0.22  | 0.74  | 0.68  | 1.00  | 0.58  | 0.35  | 0.55         | 0.61         | 0.66 |
| IL-17        | 0.52  | 0.41  | 0.83 | 0.39 | 0.57 | 0.56 | 0.11  | 0.15  | 0.57  | 0.65  | 0.58  | 1.00  | 0.39  | 0.43         | 0.31         | 0.51 |
| IL-23        | 0.31  | 0.32  | 0.38 | 0.26 | 0.37 | 0.29 | -0.03 | 0.32  | 0.40  | 0.36  | 0.35  | 0.39  | 1.00  | 0.44         | 0.38         | 0.39 |
| IFN $\gamma$ | 0.50  | 0.69  | 0.53 | 0.52 | 0.44 | 0.58 | 0.30  | 0.48  | 0.60  | 0.51  | 0.55  | 0.43  | 0.44  | 1.00         | 0.77         | 0.64 |
| TNF $\alpha$ | 0.51  | 0.83  | 0.37 | 0.68 | 0.40 | 0.59 | 0.39  | 0.38  | 0.58  | 0.49  | 0.61  | 0.31  | 0.38  | 0.77         | 1.00         | 0.78 |
| Lta          | 0.52  | 0.77  | 0.53 | 0.66 | 0.45 | 0.58 | 0.39  | 0.22  | 0.65  | 0.57  | 0.66  | 0.51  | 0.39  | 0.64         | 0.78         | 1.00 |

**Table S5.** Spearman cross-correlation coefficients for the expression of 16 cytokines in the CFS patient group (HC).

|       | IL-1a | IL-1b | IL-2 | IL-4 | IL-5 | IL-6 | IL-8  | IL-10 | IL-12 | IL-13 | IL-15 | IL-17 | IL-23 | IFNy | TNFa | Lta  |
|-------|-------|-------|------|------|------|------|-------|-------|-------|-------|-------|-------|-------|------|------|------|
| IL-1a | 1.00  | 0.51  | 0.43 | 0.30 | 0.46 | 0.40 | 0.34  | 0.34  | 0.47  | 0.30  | 0.53  | 0.26  | 0.47  | 0.51 | 0.58 | 0.59 |
| IL-1b | 0.51  | 1.00  | 0.83 | 0.86 | 0.31 | 0.54 | 0.37  | 0.42  | 0.58  | 0.36  | 0.83  | 0.42  | 0.37  | 0.89 | 0.93 | 0.75 |
| IL-2  | 0.43  | 0.83  | 1.00 | 0.75 | 0.17 | 0.33 | 0.35  | 0.33  | 0.44  | 0.21  | 0.81  | 0.33  | 0.34  | 0.77 | 0.86 | 0.53 |
| IL-4  | 0.30  | 0.86  | 0.75 | 1.00 | 0.17 | 0.51 | 0.29  | 0.40  | 0.58  | 0.33  | 0.70  | 0.41  | 0.23  | 0.87 | 0.81 | 0.64 |
| IL-5  | 0.46  | 0.31  | 0.17 | 0.17 | 1.00 | 0.52 | 0.10  | 0.44  | 0.43  | 0.32  | 0.40  | 0.38  | 0.25  | 0.24 | 0.29 | 0.27 |
| IL-6  | 0.40  | 0.54  | 0.33 | 0.51 | 0.52 | 1.00 | 0.14  | 0.69  | 0.73  | 0.47  | 0.50  | 0.44  | 0.37  | 0.53 | 0.45 | 0.57 |
| IL-8  | 0.34  | 0.37  | 0.35 | 0.29 | 0.10 | 0.14 | 1.00  | -0.02 | 0.17  | -0.07 | 0.42  | -0.19 | 0.08  | 0.43 | 0.44 | 0.46 |
| IL-10 | 0.34  | 0.42  | 0.33 | 0.40 | 0.44 | 0.69 | -0.02 | 1.00  | 0.54  | 0.60  | 0.48  | 0.54  | 0.55  | 0.40 | 0.42 | 0.45 |
| IL-12 | 0.47  | 0.58  | 0.44 | 0.58 | 0.43 | 0.73 | 0.17  | 0.54  | 1.00  | 0.52  | 0.56  | 0.33  | 0.32  | 0.57 | 0.54 | 0.63 |
| IL-13 | 0.30  | 0.36  | 0.21 | 0.33 | 0.32 | 0.47 | -0.07 | 0.60  | 0.52  | 1.00  | 0.38  | 0.34  | 0.28  | 0.41 | 0.33 | 0.31 |
| IL-15 | 0.53  | 0.83  | 0.81 | 0.70 | 0.40 | 0.50 | 0.42  | 0.48  | 0.56  | 0.38  | 1.00  | 0.29  | 0.45  | 0.79 | 0.90 | 0.61 |
| IL-17 | 0.26  | 0.42  | 0.33 | 0.41 | 0.38 | 0.44 | -0.19 | 0.54  | 0.33  | 0.34  | 0.29  | 1.00  | 0.28  | 0.36 | 0.36 | 0.29 |
| IL-23 | 0.47  | 0.37  | 0.34 | 0.23 | 0.25 | 0.37 | 0.08  | 0.55  | 0.32  | 0.28  | 0.45  | 0.28  | 1.00  | 0.30 | 0.38 | 0.39 |
| IFNy  | 0.51  | 0.89  | 0.77 | 0.87 | 0.24 | 0.53 | 0.43  | 0.40  | 0.57  | 0.41  | 0.79  | 0.36  | 0.30  | 1.00 | 0.89 | 0.78 |
| TNFa  | 0.58  | 0.93  | 0.86 | 0.81 | 0.29 | 0.45 | 0.44  | 0.42  | 0.54  | 0.33  | 0.90  | 0.36  | 0.38  | 0.89 | 1.00 | 0.71 |
| Lta   | 0.59  | 0.75  | 0.53 | 0.64 | 0.27 | 0.57 | 0.46  | 0.45  | 0.63  | 0.31  | 0.61  | 0.29  | 0.39  | 0.78 | 0.71 | 1.00 |

Fig.S1. Broderick, Formal Anal. of Cytokine Networks

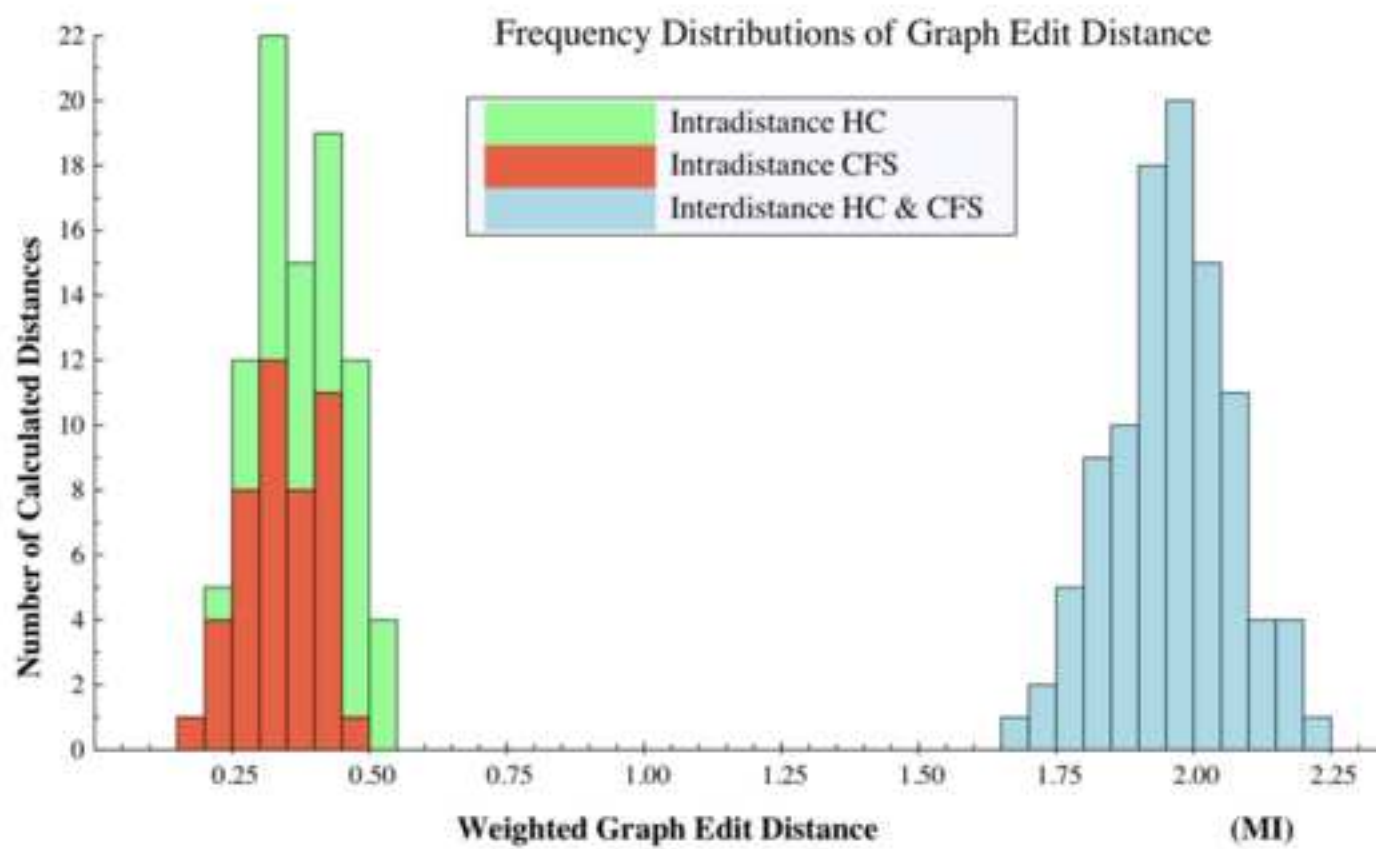

Supplement: NIHMS203224-supplement-01.pdf [file NIHMS203224-supplement-01.pdf]
